# Supplementary material for: Uniform copper–cobalt phosphides embedded in N-doped carbon frameworks as efficient bifunctional oxygen electrocatalysts for rechargeable Zn–air batteries
Source: Royal Society of Chemistry journal article supplement (doi:10.1039/c9nr04837e), 2019-01-01
Supplement: c9nr04837e1.pdf [file c9nr04837e1.pdf]

## Supporting Information

### **Uniform copper-cobalt phosphides embedded in N-doped carbon framework as efficient bifunctional oxygen electrocatalysts for rechargeable Zn-air batteries**

Hang Zhang,<sup>a,c,d</sup> Zhao Yang,<sup>a,c,d</sup> Xuemin Wang,<sup>a,c,d</sup> Sihao Yan,<sup>a,c,d</sup> Tianyou Zhou,<sup>b</sup> Cui Zhang,<sup>\*,a,c,d</sup>

Shane G. Telfer,<sup>\*,b</sup> and Shuangxi Liu<sup>\*, a,c,d</sup>

- a. Institute of New Catalytic Materials Science, School of Materials Science and Engineering, Nankai University, Tianjin 300350, PR China. \*E-mail: zhangcui@nankai.edu.cn; sliu@nankai.edu.cn*
- b. Institute of Fundamental Sciences, Massey University, Palmerston North 4442, New Zealand. \*E-mail: S.Telfer@massey.ac.nz*
- c. National Institute of Advanced Materials, Nankai University, Tianjin 300350, PR China.*
- d. Tianjin Collaborative Innovation Center for Chemistry & Chemical Engineering, Tianjin 300072, PR China*

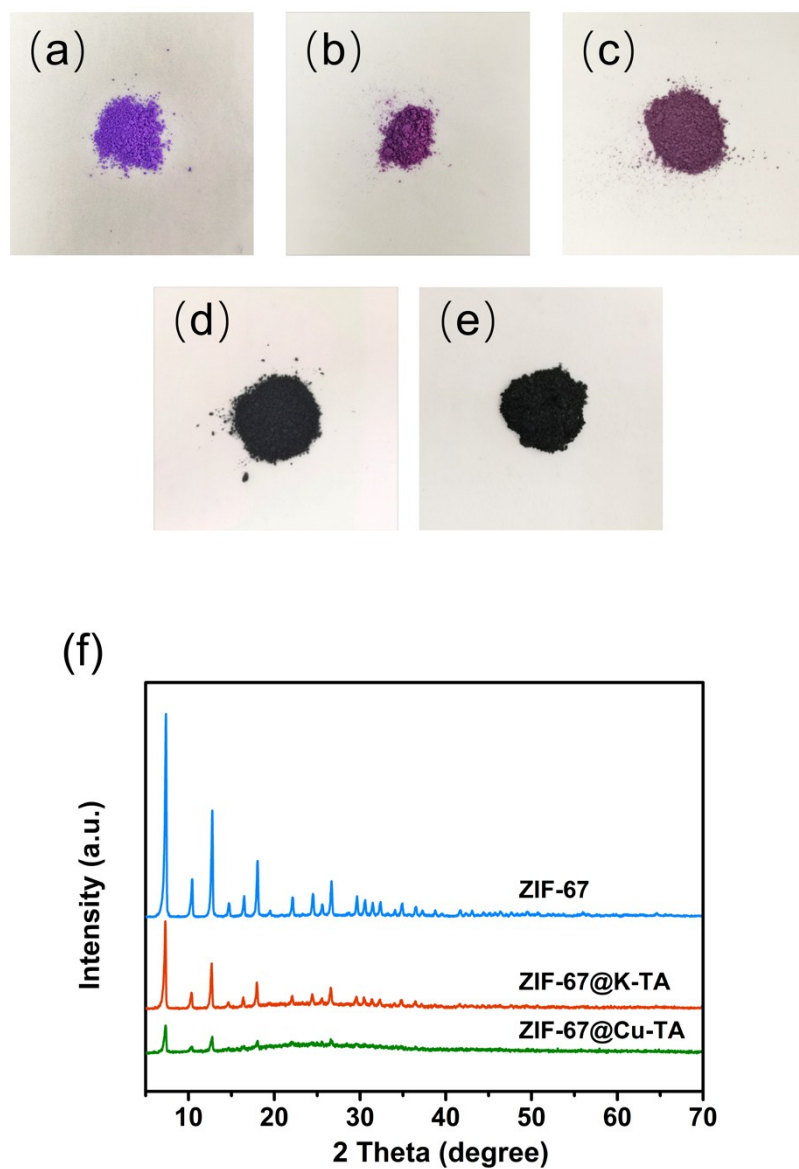

**Fig. S1** The photographs of the (a) ZIF-67, (b) ZIF-67@K-TA, (c) ZIF-67@Cu-TA, (d) CuCo-NC-700 and (e) CuCoP-NC-700. (f) XRD patterns of the ZIF-67, ZIF-67@K-TA and ZIF-67@Cu-TA.

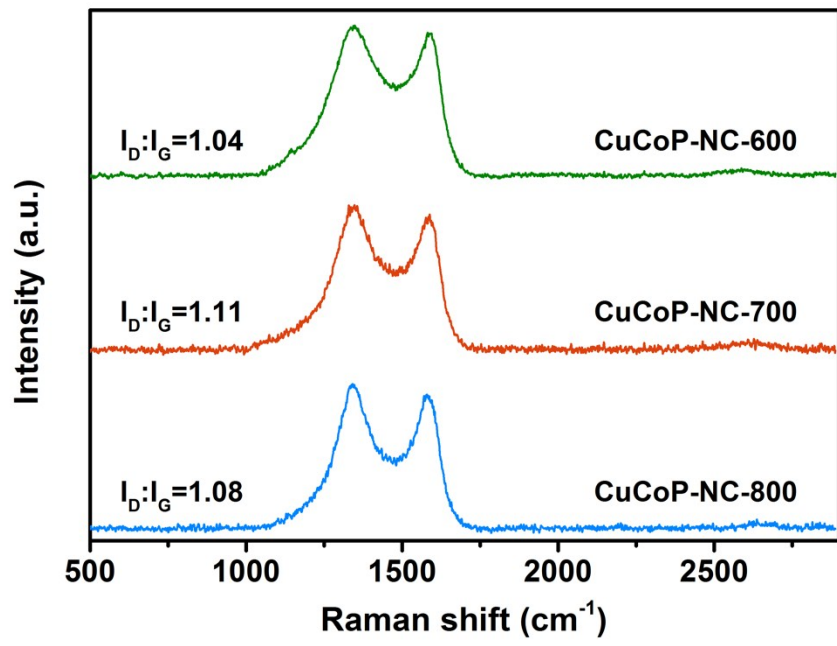

Fig. S2 Raman spectra of CuCoP-NC-X.

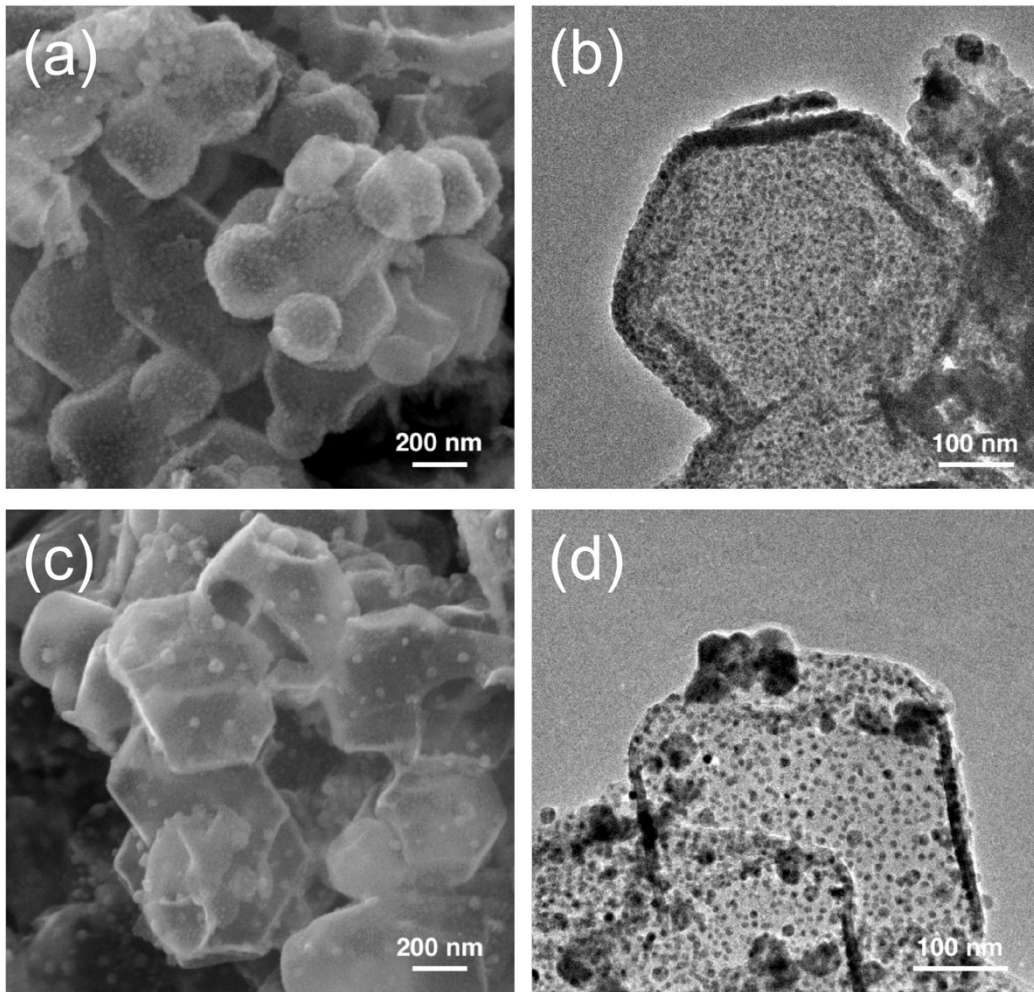

**Fig. S3** SEM and TEM images of (a, b) CuCoP-NC-600 and (c, d) CuCoP-NC-800.

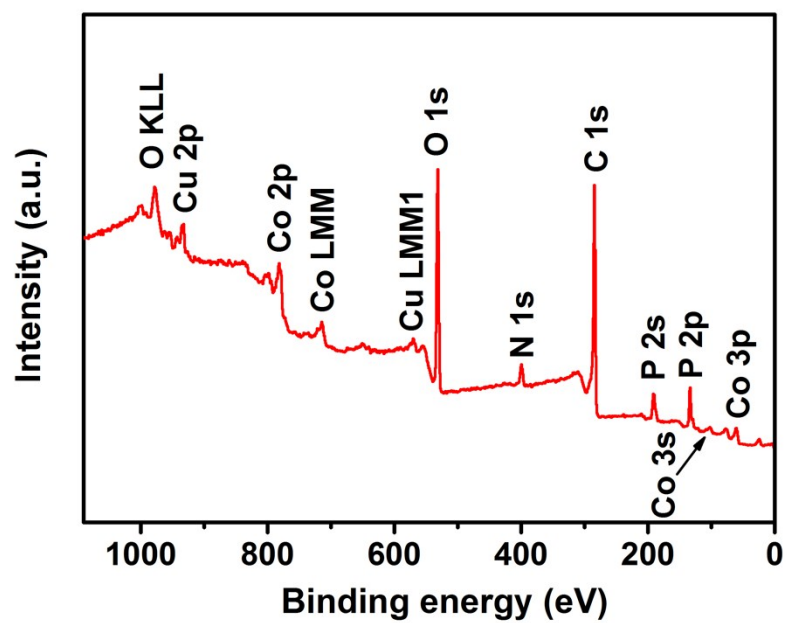

**Fig. S4** Survey XPS spectrum of CuCoP-NC-700.

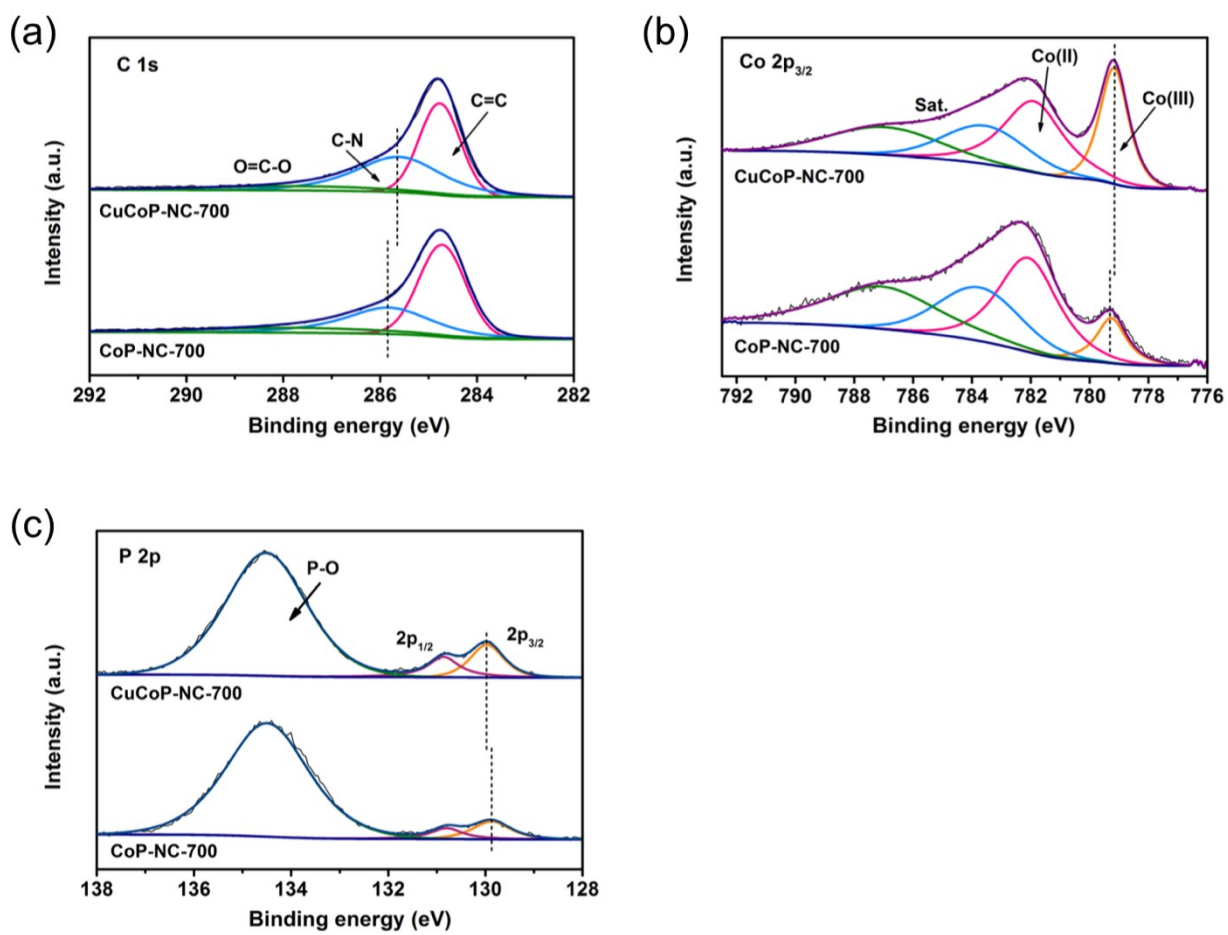

**Fig. S5** XPS spectra of CuCoP-NC-700 and CoP-NC-700 for (a) C 1s, (b) Co 2p<sub>3/2</sub> and (c) P 2p.

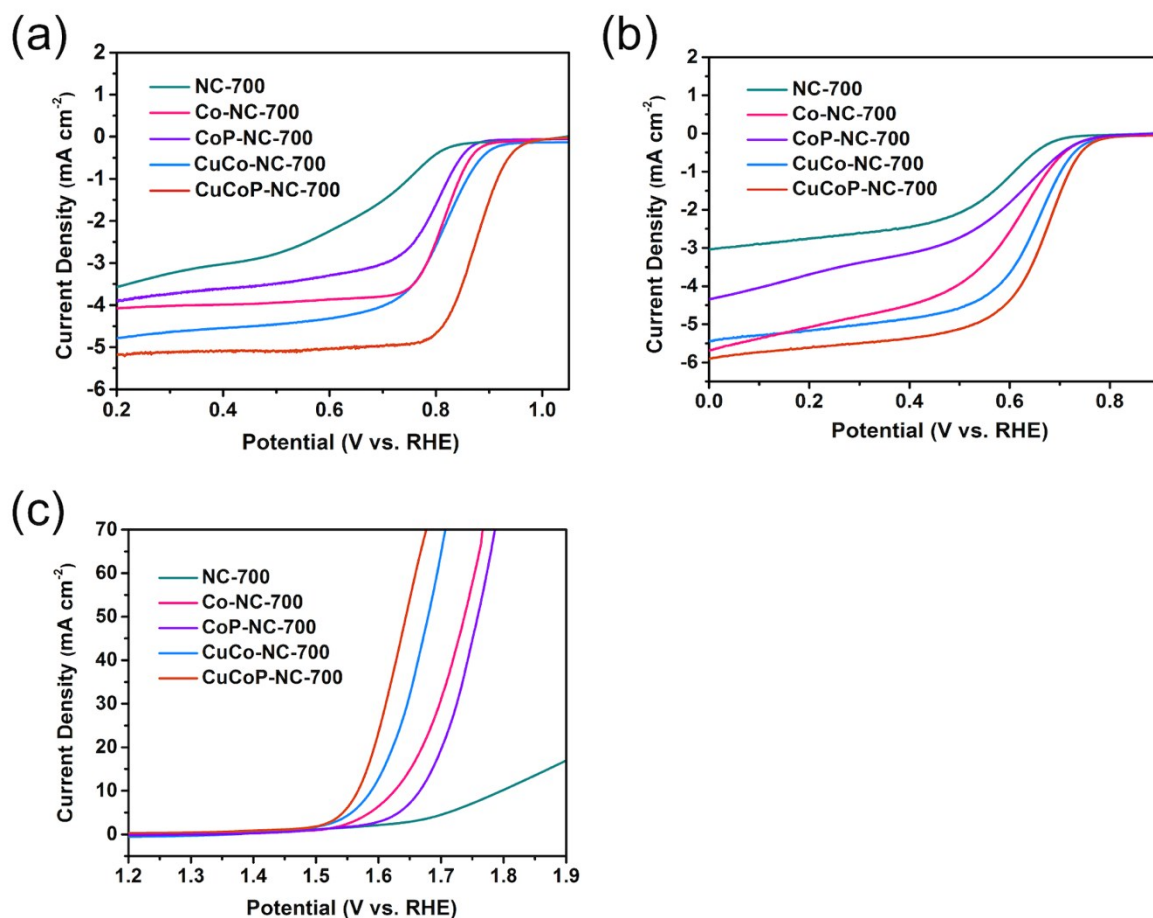

**Fig. S6** LSV curves of NC-700, Co-NC-700, CoP-NC-700, CuCo-NC-700 and CuCoP-NC-700 at a scan rate of 10 mV s<sup>-1</sup> and a rotating speed of 1600 rpm in O<sub>2</sub> saturated (a) 0.1 M KOH solution and (b) 0.5 M H<sub>2</sub>SO<sub>4</sub> solution towards ORR. (c) LSV curves of NC-700, Co-NC-700, CoP-NC-700, CuCo-NC-700 and CuCoP-NC-700 at a scan rate of 10 mV s<sup>-1</sup> in 1 M KOH solution towards OER.

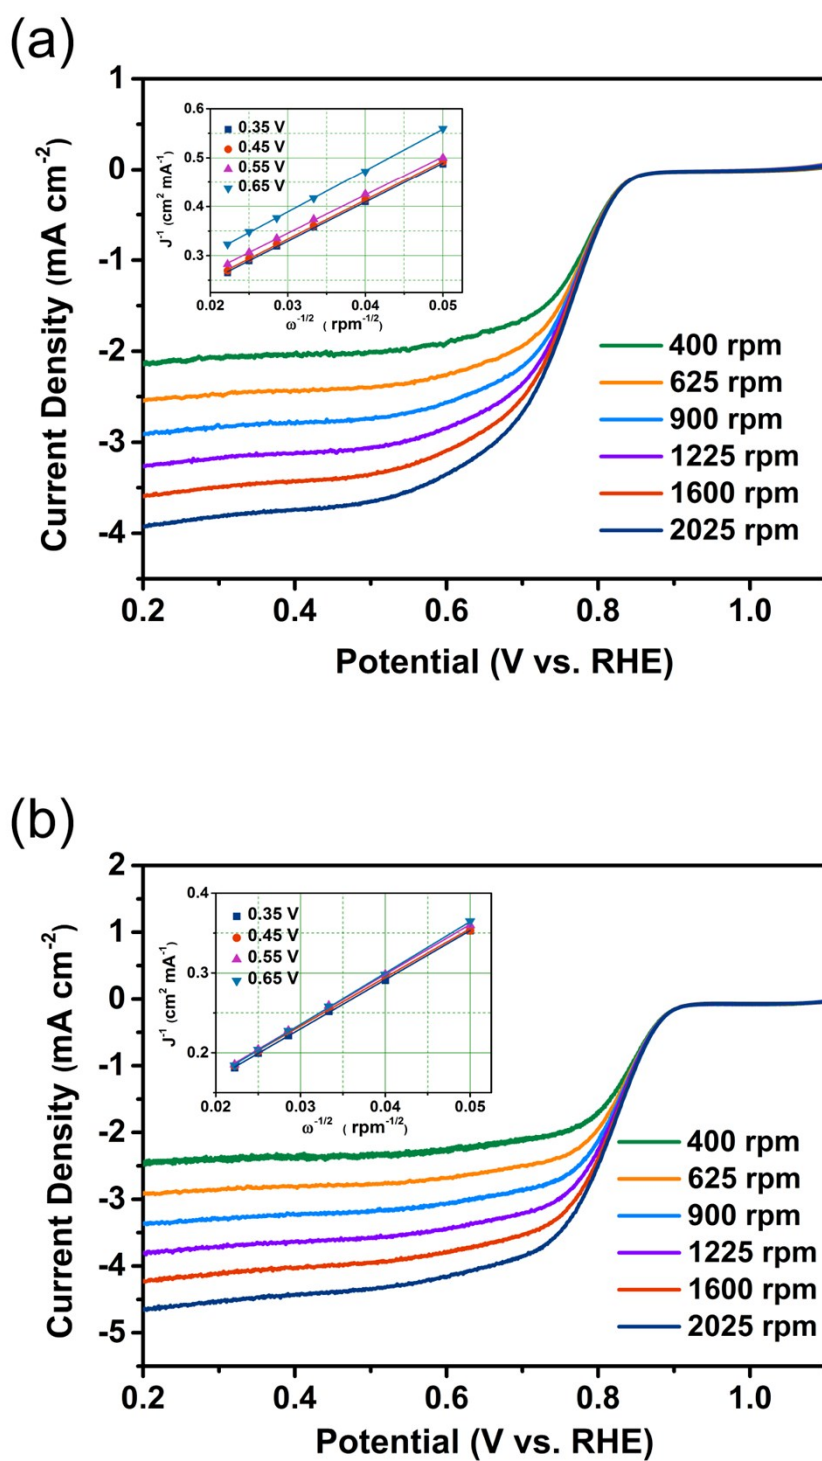

**Fig. S7** LSV curves of (a) CuCoP-NC-600 and (b) CuCoP-NC-800 under different rpms ranging from 400 to 2025 rpm in  $\text{O}_2$  saturated 0.1 M KOH solution and K-L plots of CuCoP-NC-600 and CuCoP-NC-800 at various potentials (inset).



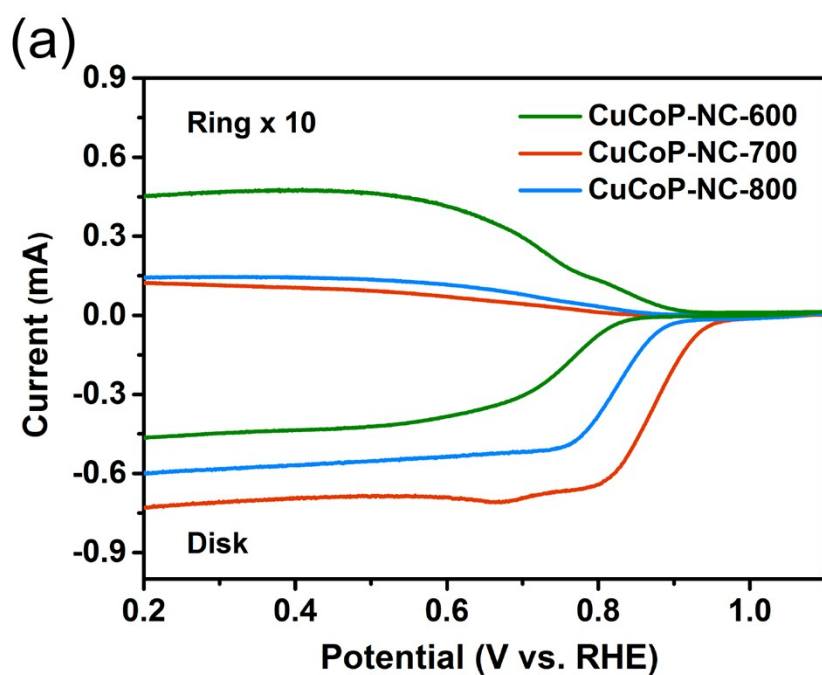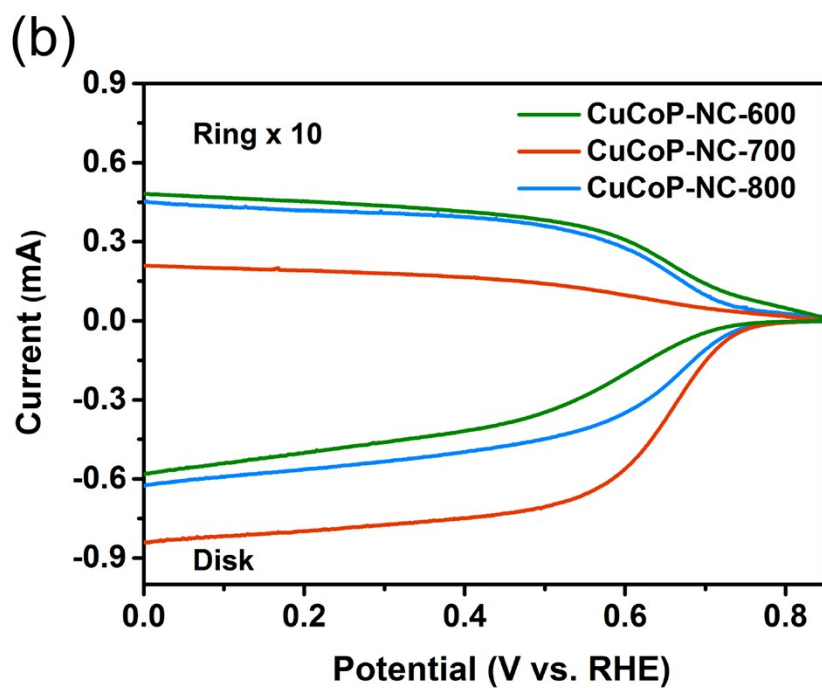

**Fig. S8** RRDE voltammograms and amperometric responses were measured with a rotating speed of 1600 rpm and in O<sub>2</sub> saturated (a) 0.1 M KOH solution and (b) 0.5 M H<sub>2</sub>SO<sub>4</sub> solution at a scan rate of 10 mV s<sup>-1</sup> of CuCoP-NC-X.

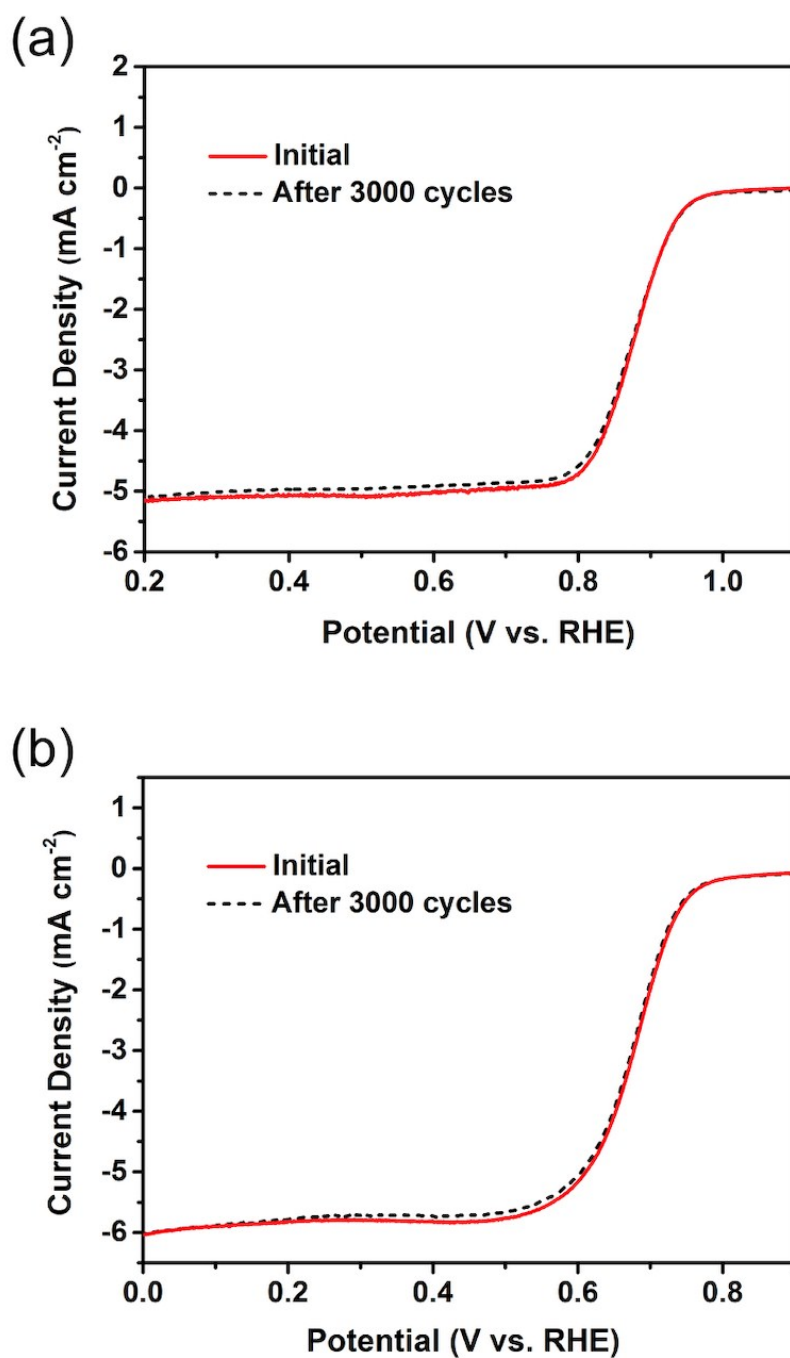

**Fig. S9** LSV curves of CuCoP-NC-700 before and after 3000 cycles tests in O<sub>2</sub> saturated (a) 0.1 M KOH solution and (b) 0.5 M H<sub>2</sub>SO<sub>4</sub> solution towards ORR durability evaluation.

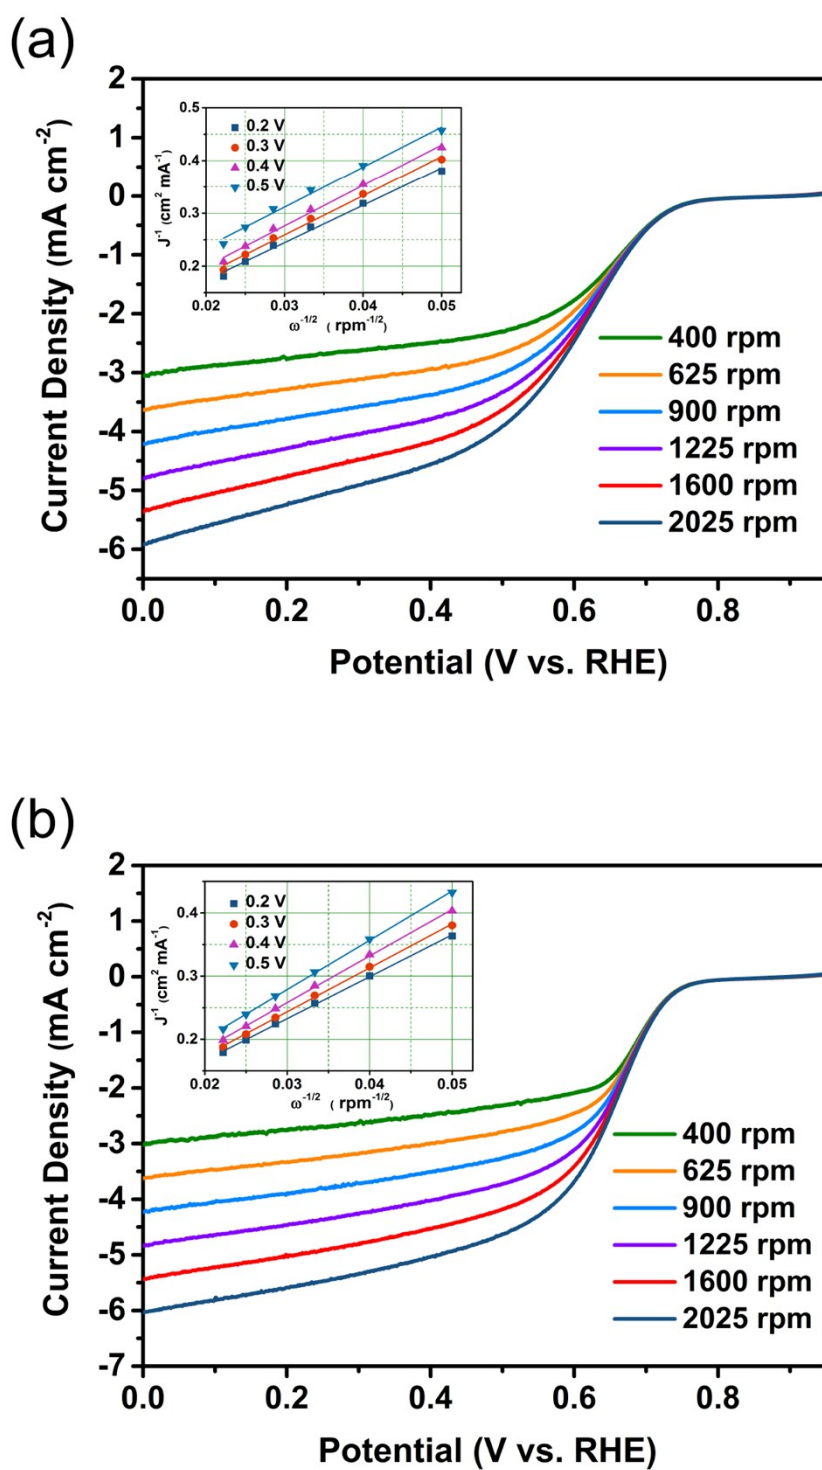

**Fig. S10** LSV curves of (a) CuCoP-NC-600 and (b) CuCoP-NC-800 under different rpms ranging from 400 to 2025 rpm in  $O_2$  saturated 0.5 M  $H_2SO_4$  solution and K-L plots of CuCoP-NC-600 and CuCoP-NC-800 at various potentials (inset).

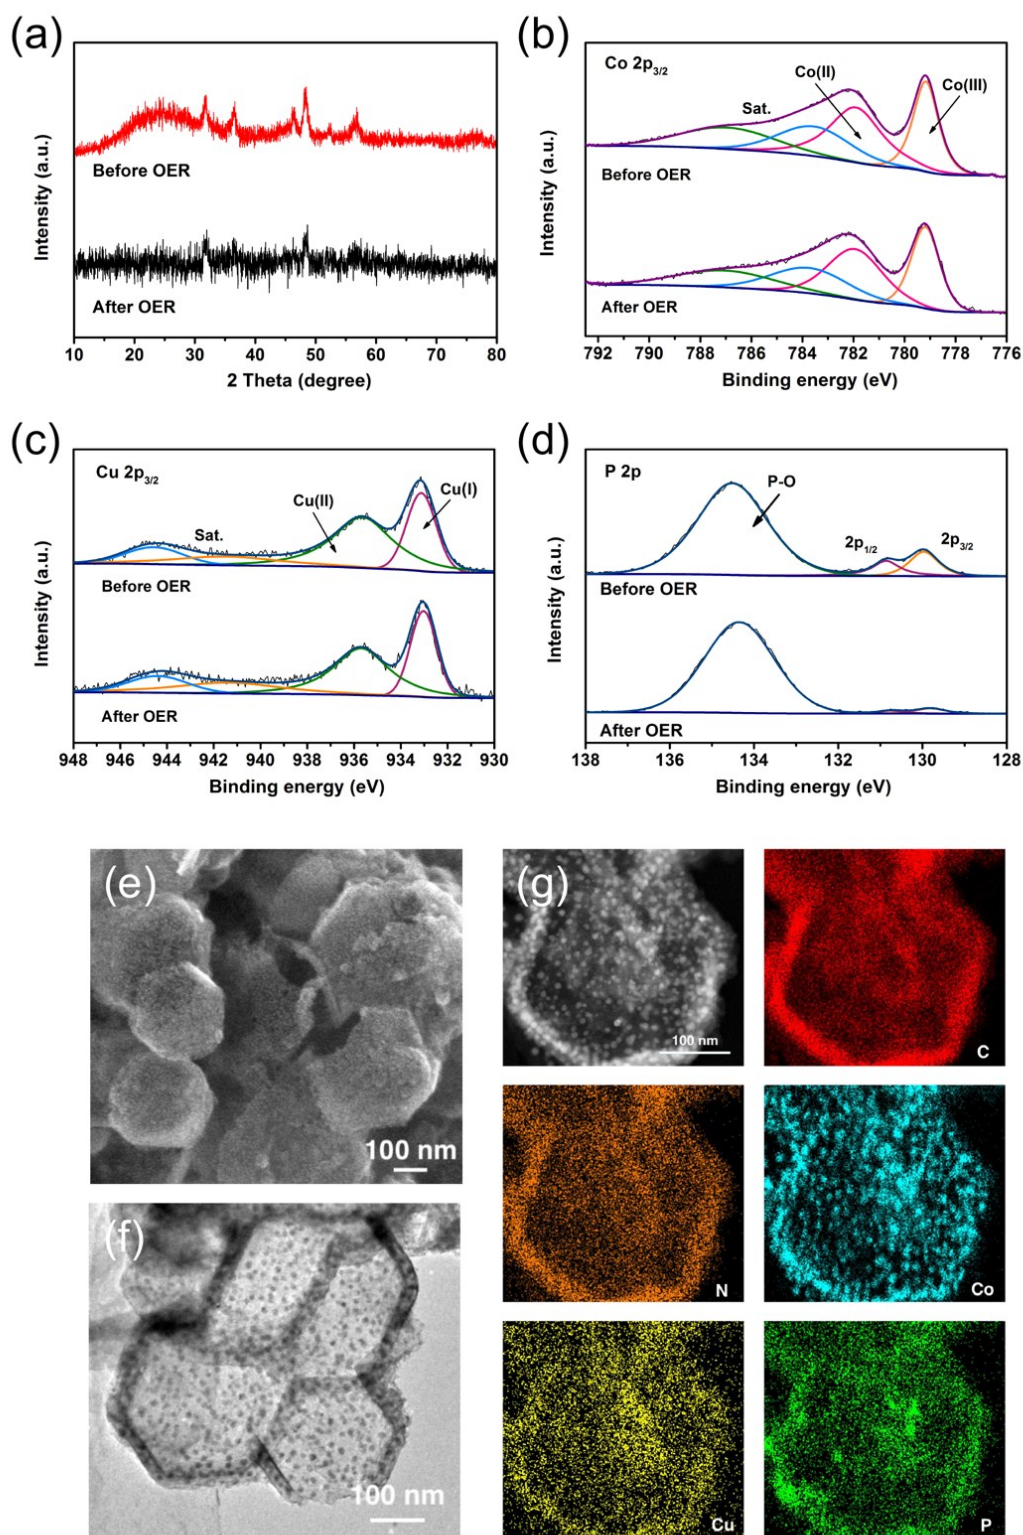

**Fig. S11** (a) XRD patterns, XPS spectra for (b) Co 2p<sub>3/2</sub>, (c) Cu 2p<sub>3/2</sub>, and (d) P 2p of CuCoP-NC-700 before and after OER durability measurement. (e) SEM image, (f) TEM image and (g) elemental mapping images of CuCoP-NC-700 after OER durability measurement.

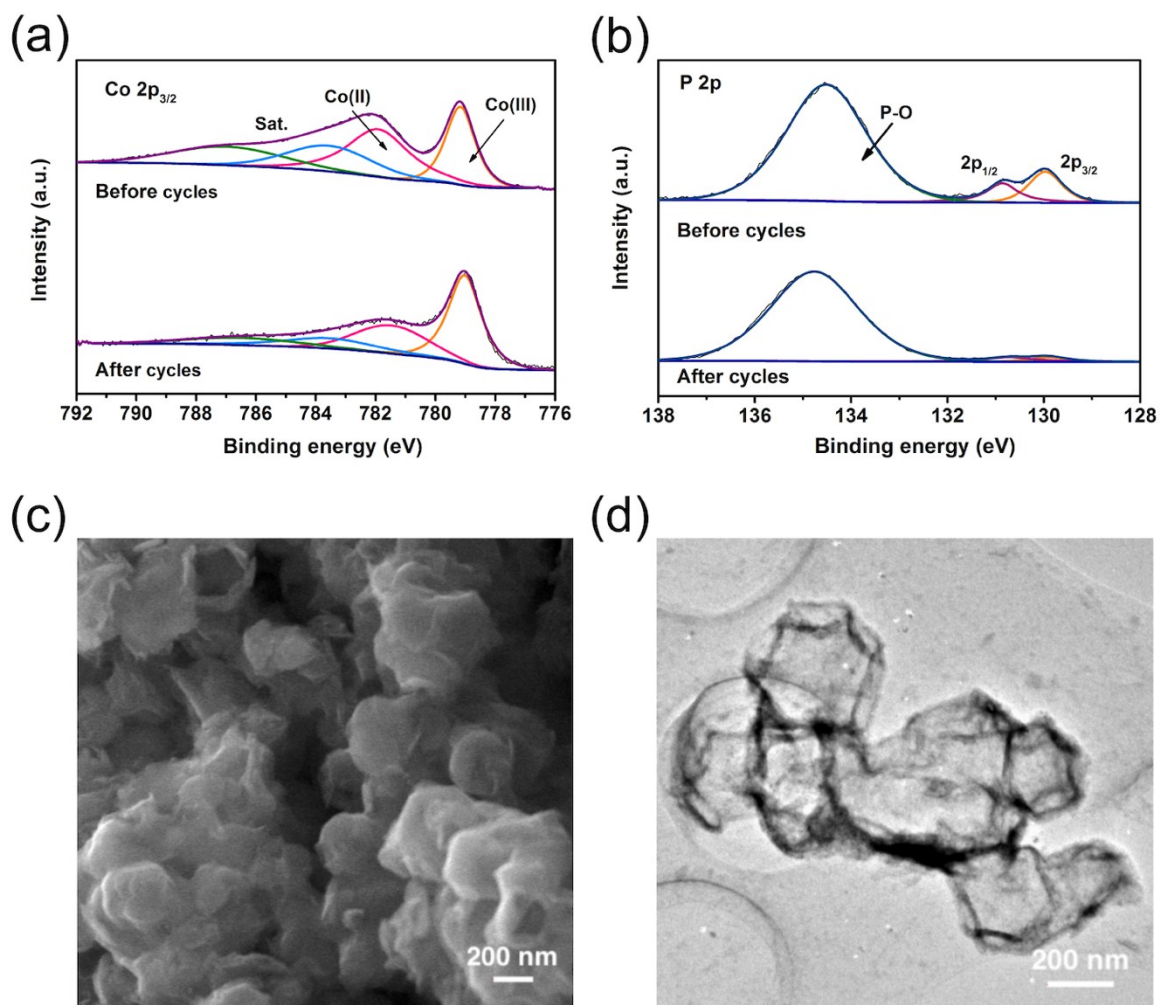

**Fig. S12** XPS spectra for (a) Co 2p<sub>3/2</sub> and (b) P 2p of CuCoP-NC-700 before and after charge-discharge cycles measurements of the Zn-air battery. (c) SEM image and (d) TEM image of CuCoP-NC-700 after charge-discharge cycles measurements of the Zn-air battery.

**Table S1** ICP data and the atom ratios of Co/Cu of CuCoP-NC-X.

| Sample       | Co contents (mg L <sup>-1</sup> ) | Cu contents (mg L <sup>-1</sup> ) | Atom ratios of Co/Cu |
|--------------|-----------------------------------|-----------------------------------|----------------------|
| CuCoP-NC-600 | 0.3586                            | 0.0960                            | 3.74/1               |
| CuCoP-NC-700 | 0.5337                            | 0.1467                            | 3.64/1               |
| CuCoP-NC-800 | 0.3670                            | 0.1031                            | 3.56/1               |

**Table S2** The relative contents and ratios of Co and Cu species in CuCoP-NC-X by XPS spectra of Co 2p<sub>3/2</sub> and Cu 2p<sub>3/2</sub>.

| Sample       | Relative contents (%) |        |       |        | Contents ratios |              |
|--------------|-----------------------|--------|-------|--------|-----------------|--------------|
|              | Co(III)               | Co(II) | Cu(I) | Cu(II) | Co(III)/Co(II)  | Cu(I)/Cu(II) |
| CuCoP-NC-600 | 9.5                   | 24.1   | 16.6  | 47.8   | 0.39/1          | 0.35/1       |
| CuCoP-NC-700 | 24.9                  | 32.5   | 29.1  | 45.2   | 0.77/1          | 0.64/1       |
| CuCoP-NC-800 | 21.7                  | 34.0   | 41.4  | 40.7   | 0.64/1          | 1.02/1       |

**Table S3** The relative contents (%) of pyridinic N, pyrrolic N and graphitic N in CuCoP-NC-X by XPS spectra of N1s.

| Sample       | Pyridinic N | Pyrrolic N | Graphitic N |
|--------------|-------------|------------|-------------|
| CuCoP-NC-600 | 21.3        | 25.5       | 53.2        |
| CuCoP-NC-700 | 35.7        | 18.2       | 46.1        |
| CuCoP-NC-800 | 25.9        | 19.6       | 54.5        |



**Table S4** The ORR electrocatalytic performance of non-precious metal materials in the recent literatures.

| Materials                  | Electrolyte                          | Onset potential<br>(V vs. RHE) | Half-wave<br>potential<br>(V vs. RHE) | References                                               |
|----------------------------|--------------------------------------|--------------------------------|---------------------------------------|----------------------------------------------------------|
| CuCoP-NC-700               | 0.1 M KOH                            | 0.978                          | 0.872                                 | <b>This work</b>                                         |
| CuCoP-NC-700               | 0.5 M H <sub>2</sub> SO <sub>4</sub> | 0.801                          | 0.670                                 | <b>This work</b>                                         |
| CoOP@bio-C                 | 0.1 M KOH                            | 0.91                           | 0.81                                  | <i>J. Mater. Chem. A</i> <b>2018</b> , 3, 546            |
| Co-BNCBNTs-900             | 0.1 M KOH                            | 0.93                           | 0.82                                  | <i>J. Mater. Chem. A</i> <b>2018</b> , 6, 24071          |
| CuCo@NC                    | 0.1 M KOH                            | 0.96                           | 0.884                                 | <i>Adv. Energy Mater.</i> <b>2018</b> , 7, 170019        |
| Cu <sub>3</sub> P@NPPC-650 | 0.1 M KOH                            | /                              | 0.78                                  | <i>Adv. Mater.</i> <b>2017</b> , 29, 1703711             |
| Fe/Co-N/S-Cs               | 0.1 M KOH                            | /                              | 0.832                                 | <i>Appl. Catal B-Environ</i> <b>2019</b> , 241, 95       |
| N-NC@G-900                 | 0.1 M KOH                            | 1.0                            | 0.85                                  | <i>Angew. Chem. Int. Ed.</i> <b>2018</b> , 130,<br>16749 |
| N-NC@G-900                 | 0.5 M H <sub>2</sub> SO <sub>4</sub> | 0.80                           | 0.65                                  | <i>Angew. Chem. Int. Ed.</i> <b>2018</b> , 130,<br>16749 |
| CoP-DC                     | 0.1 M KOH                            | /                              | 0.81                                  | <i>Adv. Energy Mater.</i> <b>2018</b> , 8, 1703623       |

**Table S5** The OER electrocatalytic performance of non-precious metal materials in the recent literatures.

| Materials                                                                                           | Electrolyte  | Overpotential at 10 mA<br>cm <sup>-2</sup> (mV) | References                                              |
|-----------------------------------------------------------------------------------------------------|--------------|-------------------------------------------------|---------------------------------------------------------|
| CuCoP-NC-700                                                                                        | 1 M KOH      | 338                                             | <b>This work</b>                                        |
| Fe <sub>1</sub> Co <sub>1</sub> -P/C                                                                | 1 M KOH      | 362                                             | <i>Small methods</i> <b>2018</b> , 353,<br>1800214      |
| 15% PANI/ZIF-67                                                                                     | 0.1 M<br>KOH | 330                                             | <i>Carbon</i> <b>2018</b> , 132, 580                    |
| Cu@CuO-C                                                                                            | 1 M KOH      | 340                                             | <i>J. Mater. Chem. A</i> <b>2018</b> , 6,<br>19176      |
| NGO/Ni <sub>7</sub> S <sub>6</sub>                                                                  | 0.1 M<br>KOH | 380                                             | <i>Adv. Funct. Mater.</i> <b>2017</b> , 27,<br>1700451  |
| NC@Co-NGC DSNC                                                                                      | 0.1 M<br>KOH | 410                                             | <i>Adv Mater.</i> <b>2017</b> , 11,<br>1700874          |
| MnCo <sub>2</sub> O <sub>4</sub>                                                                    | 0.1 M<br>KOH | 400                                             | <i>Angew. Chem. Int. Ed.</i> <b>2017</b> ,<br>27, 6834  |
| Mn <sub>3</sub> Co <sub>7</sub> -<br>Co <sub>2</sub> Mn <sub>3</sub> O <sub>8</sub> @CNTs/CNFs-1000 | 1 M KOH      | 374                                             | <i>Energy Environ. Sci.</i> <b>2017</b> ,<br>10, 321    |
| CoP <sub>3</sub> CPs                                                                                | 1 M KOH      | 343                                             | <i>Phys. Chem. Chem.Phys.</i><br><b>2017</b> , 19, 2104 |

**Table S6** The performance of Zn-air batteries of non-precious metal materials in the recent literatures.

| Materials                                | Open-circuit voltage (V) | Power density (mW cm <sup>-2</sup> ) | Durability@ J (mA cm <sup>-2</sup> ) | References                                                 |
|------------------------------------------|--------------------------|--------------------------------------|--------------------------------------|------------------------------------------------------------|
| CuCoP-NC-700                             | 1.51                     | 116.5                                | Cycle time<br>over 80h@10            | <b>This work</b>                                           |
| Mn <sub>0.9</sub> Fe <sub>2.1</sub> C/NC | 1.5                      | 160                                  | Cycle number<br>over 1000@5          | <i>ACS Appl. Energy Mater.</i> <b>2019</b> , 2, 1747       |
| Co <sub>4</sub> N@NC-m                   | 1.49                     | 98.6                                 | Cycle number<br>over 200@10          | <i>Carbon</i> <b>2019</b> , 151, 10                        |
| Co-NiO                                   | 1.446                    | 93                                   | Cycle time<br>over 100h@2            | <i>Appl. Catal B-Environ</i> <b>2019</b> , 250, 71         |
| Co-POC                                   | /                        | 78.0                                 | Cycle time<br>over 25h@2             | <i>Adv. Mater.</i> <b>2019</b> , 31, 1900592               |
| Co@SNHC                                  | 1.48                     | 105.8                                | Cycle time<br>over 70h@5             | <i>J. Mater. Chem. A</i> <b>2019</b> , 7, 14291            |
| Ag-MnO <sub>2</sub>                      | /                        | 273.2                                | Cycle number<br>over 3200@10         | <i>Chemical Engineering Journal</i> <b>2019</b> , 366, 631 |
| Cu-Fe-N-C                                | 1.48                     | 92                                   | /                                    | <i>Adv. Funct. Mater.</i> <b>2018</b> , 28, 1802596        |
| Cu <sub>3</sub> P@NPPC-650               | 1.46                     | 110.8                                | Cycle time<br>over 35h@5             | <i>Adv. Mater.</i> <b>2017</b> , 29, 1703711               |
